# Supplementary material for: Picric acid sensing by carbon nanodots: theoretical validation of selectivity
Source: Royal Society of Chemistry journal article supplement (doi:10.1039/d5tc02999f), 2025-12-23
Supplement: d5tc02999f1.pdf [file d5tc02999f1.pdf]

## **Electronic Supplementary Information**

# **Picric Acid sensing by Carbon Nanodots: Theoretical Validation of Selectivity**

**Nidhisha V<sup>a</sup>., Vijisha K Rajan<sup>b</sup> and Renuka N K<sup>\*a</sup>.**

<sup>a</sup>Advanced Materials Research Centre, Department of Chemistry  
University of Calicut, Kerala 673635, India. \*E-mail: [renuka@uoc.ac.in](mailto:renuka@uoc.ac.in)

<sup>b</sup>Department of Nanoscience and Technology  
University of Calicut, Kerala 673635, India.

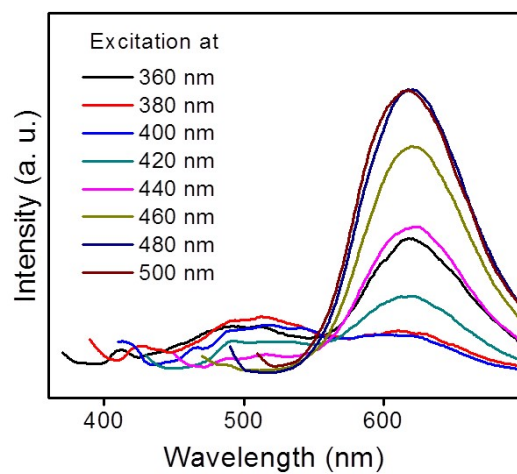

**Figure S1:** Excitation dependent emission of PD-CNDs

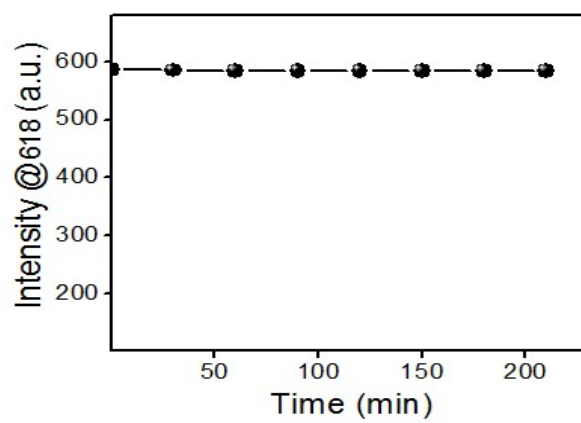

**Figure S2:** Photostability of PD-CNDs under continuous UV illumination

**Table S1:**  
analytes  
for theDetails of  
selected  
studies

| No | Compound                    | Abbr.  | Molecular weight | Structure                                                                             |
|----|-----------------------------|--------|------------------|---------------------------------------------------------------------------------------|
| 1  | o-Nitrotoluene              | o-NT   | 137.14           | 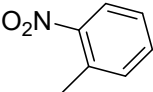   |
| 2  | m-Nitrotoluene              | m-NT   | 137.14           |    |
| 3  | p-Nitrotoluene              | p-NT   | 137.14           |    |
| 4  | m-Nitrobenzaldehyde         | m-NBZA | 151.12           |    |
| 5  | p-Nitrobenzaldehyde         | p-NBZA | 151.12           |   |
| 6  | Nitrobenzene                | NB     | 123.11           |  |
| 7  | p-Nitrophenol               | p-NP   | 139.11           |  |
| 8  | p-Nitrobenzoic acid         | p-NBA  | 167.12           |  |
| 9  | Picric acid                 | PA     | 229.11           |  |
| 10 | 1-chloro-2,4-dinitrobenzene | CDNB   | 202.55           |  |

|    |              |     |        |                                                                                     |
|----|--------------|-----|--------|-------------------------------------------------------------------------------------|
| 11 | Benzaldehyde | BZA | 106.12 | 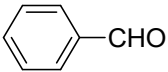 |
| 12 | Toluene      | T   | 92.14  |  |
| 13 | Aniline      | A   | 93.14  |  |
| 14 | Benzoic acid | BA  | 122.12 |  |

---

**Table S2:** Optimized geometries and HOMO / LUMO of selected nitroaromatic compounds

| Compound                                                                                              | HOMO                                                                                | LUMO                                                                                  |
|-------------------------------------------------------------------------------------------------------|-------------------------------------------------------------------------------------|---------------------------------------------------------------------------------------|
| <br><i>o</i> -NT     |    |    |
| <br><i>m</i> -NT     |    |    |
| <br><i>p</i> -NT    |    |    |
| <br><i>m</i> -NBZA |  |  |
| <br><i>p</i> -NBZA |  |  |
| <br>NB             |  |  |

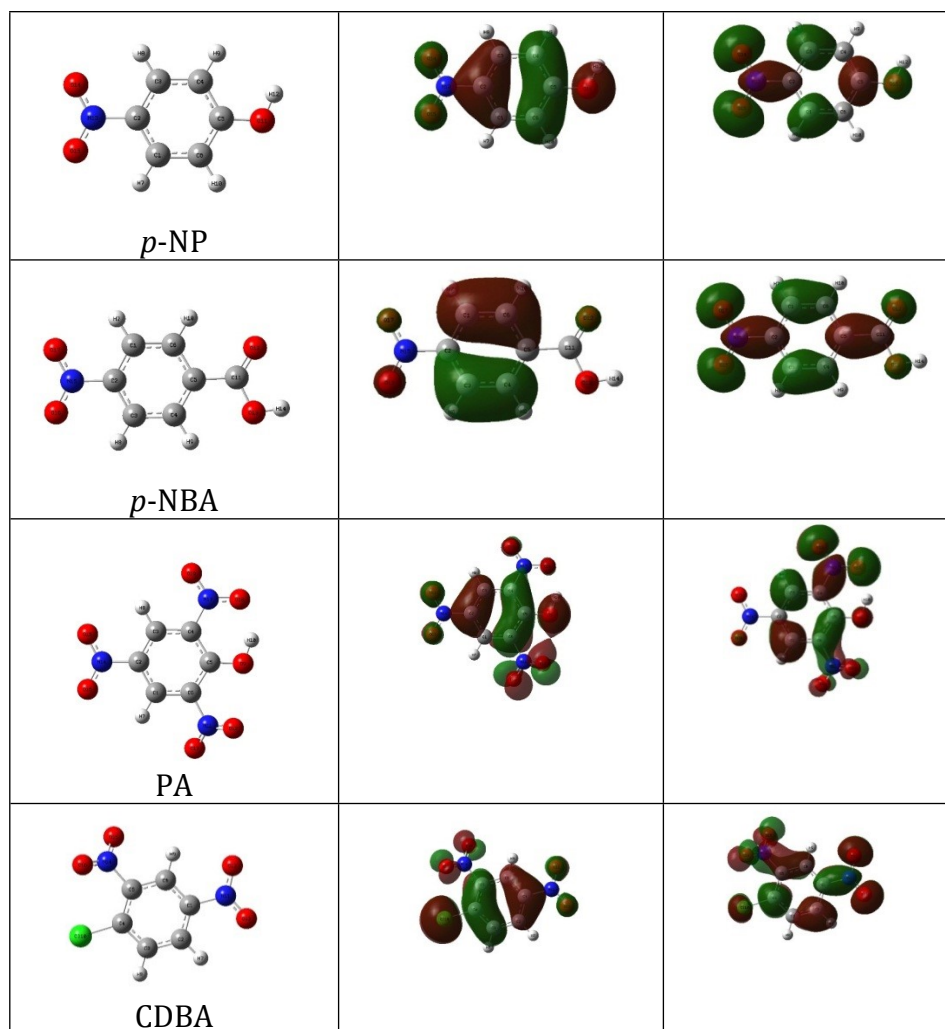

### Cyclic voltammetry measurements for determining the energy levels

The HOMO and LUMO energy levels of PD-CNDs could be estimated according to the empirical formula:

$$E_{\text{HOMO}} = -e(E_{\text{ox}} + 4.4) \quad (1)$$

$$E_{\text{LUMO}} = -e(E_{\text{red}} + 4.4) \quad (2)$$

Where  $E_{\text{ox}}$  and  $E_{\text{red}}$  are the onset of oxidation and reduction potential for PD-CNDs respectively.

The  $E_{\text{red}}$  was determined to be -0.21 V. The corresponding  $E_{\text{LUMO}}$  was calculated to be -4.19 eV.

To determine the HOMO levels, we combined the  $E_{\text{red}}$  with the optical energy band gap ( $E_{\text{g}}$ , resulting from the absorption edge in the absorption spectrum):

$$E_{\text{HOMO}} = E_{\text{LUMO}} - E_{\text{g}} \quad (3)$$

$E_{\text{g}}$  was estimated to be 2.41 eV. So, the  $E_{\text{HOMO}}$  was calculated to be -6.60 eV.

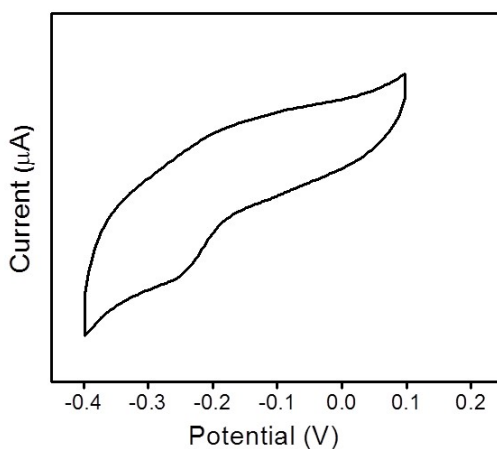

**Figure S3:** Cyclic voltammogram of PD-CNDs

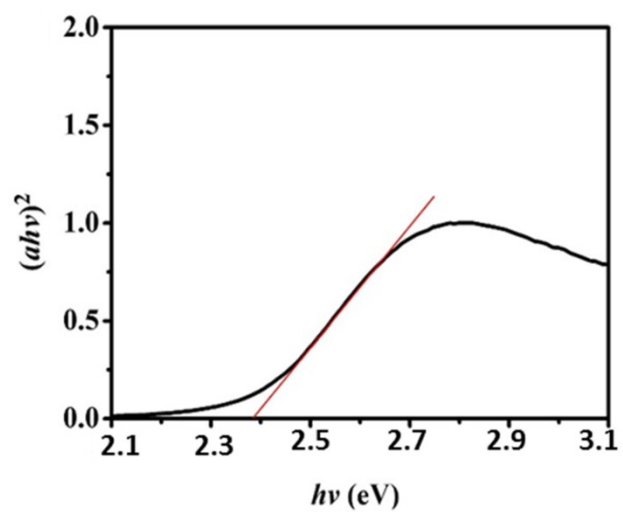

**Figure S4:** Tauc plot derived from UV Visible absorbance spectrum of PD-CNDs
